# Supplementary material for: Contrasting interannual atmospheric CO 2 variabilities and their terrestrial mechanisms for two types of El Niños
Source: Copernicus journal article supplement (doi:10.5194/acp-18-10333-2018), 2018-07-19
Supplement: Supplementary file 1 [file acp-18-10333-2018-supplement.pdf]

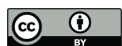

*Supplement of*

## **Contrasting interannual atmospheric CO<sub>2</sub> variabilities and their terrestrial mechanisms for two types of El Niños**

**Jun Wang et al.**

*Correspondence to:* Ning Zeng (zeng@umd.edu) and Fei Jiang (jiangf@nju.edu.cn)

The copyright of individual parts of the supplement might differ from the CC BY 4.0 License.

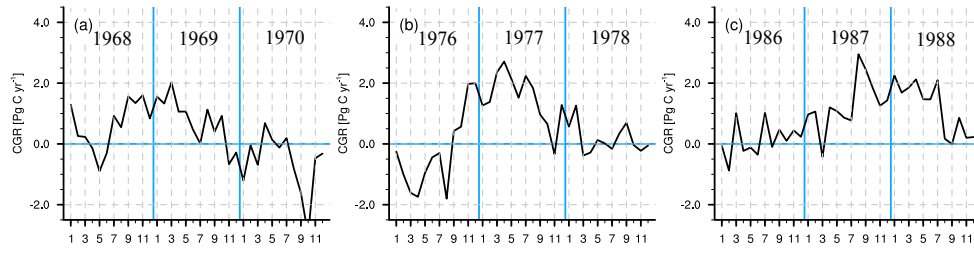

Figure S1 The atmospheric CO<sub>2</sub> growth rate anomalies in the long-lasting El Niño events.

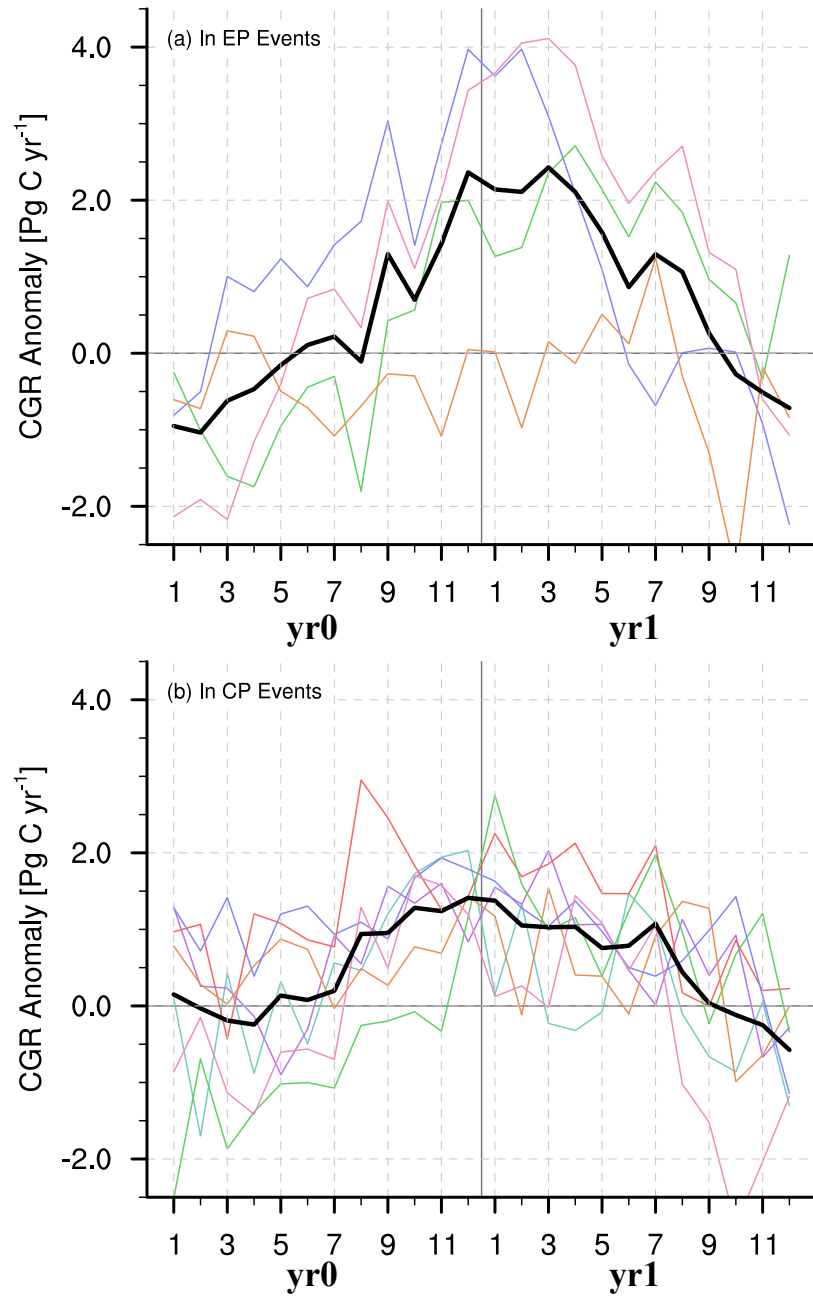

Figure S2 Behaviors of CGR anomalies (Pg C yr<sup>-1</sup>) in the individual EP and CP El Niño events. (a) In EP Events. (b) In CP Events. The thickened black line represents the composite result.

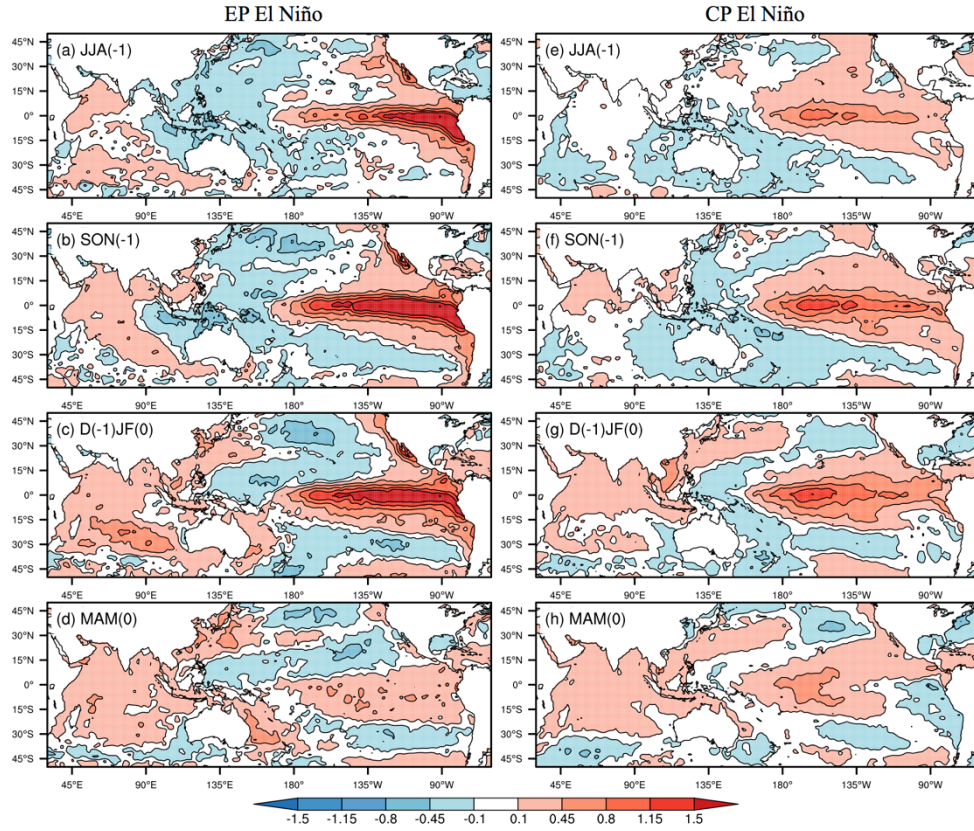

Figure S3 Seasonal evolutions of sea surface temperature anomaly (SSTA) during the EP and CP El Niño event. (a–d) composite SSTA evolution in EP El Niño, (e–h) composite SSTA evolution in CP El Niño.

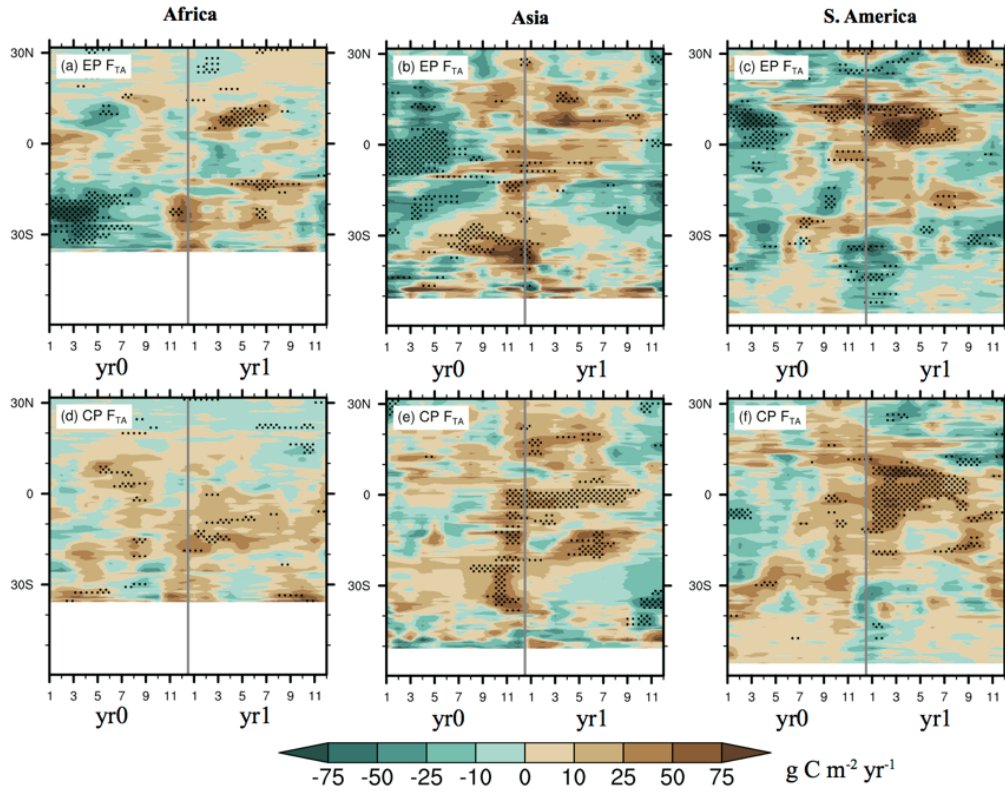

Figure S4 Hovmöller diagrams of the anomalies of  $F_{TA}$  during two types of El Niños. (a and d)  $F_{TA}$  anomaly over the Africa during EP and CP El Niños; (b and e)  $F_{TA}$  anomaly over the Asia during EP and CP El Niños; (c and f)  $F_{TA}$  anomaly over the South America. Dotted areas indicate the significance above the 80% level estimated by Student's *t*-test.

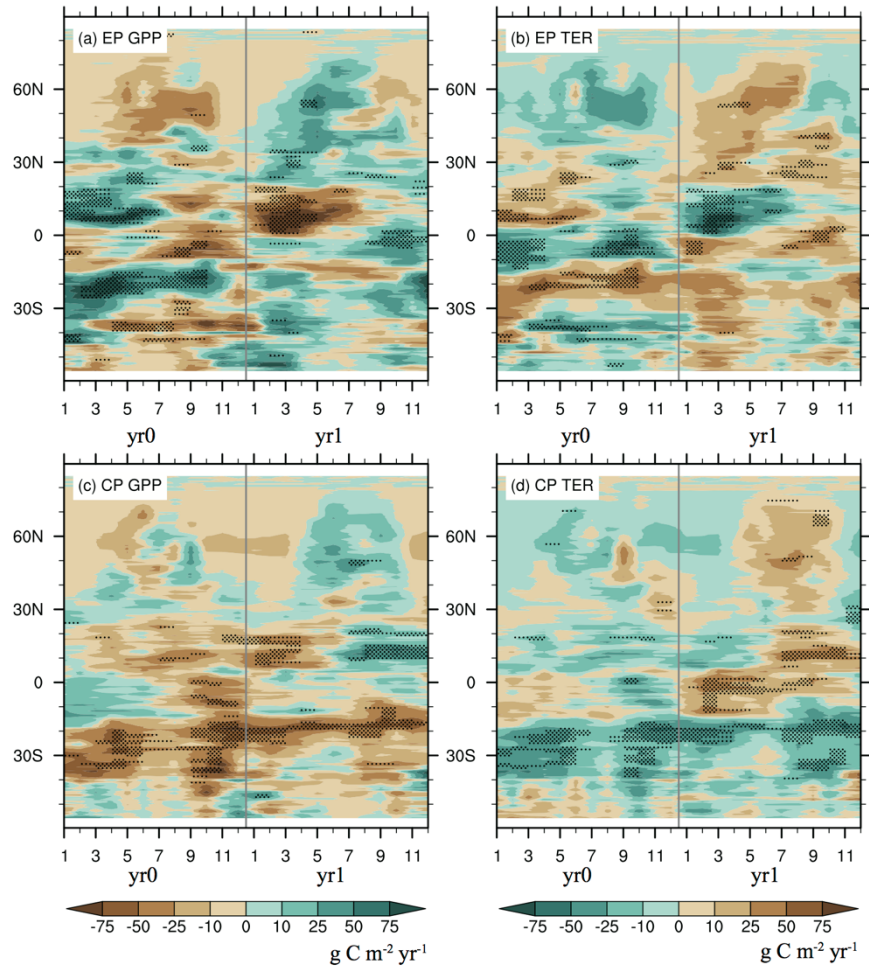

Figure S5 Hovmöller diagrams of the anomalies of terrestrial GPP and TER (averaged from 180°W to 180°E) during two types of El Niños. (a and c) GPP anomaly during EP and CP El Niño events, (b and d) TER anomaly during EP and CP El Niño events. Dotted areas indicate the significance above the 80% level estimated by Student's *t*-test.

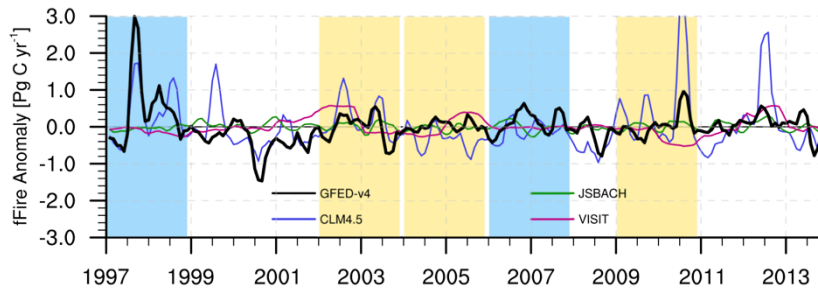

Figure S6 Carbon flux anomalies caused by wildfires from 1997 to 2013. The bars represent the El Niño events during this period selected in this study, with the EP El Niño in blue and CP El Niño in yellow. The GFED-v4 dataset can be referred to Randerson et al. (2015).

## Reference

Randerson, J. T., van der Werf, G. R., Giglio, L., Collatz, G. J., and Kasibhatla, P. S.:  
Global Fire Emissions Database, Version 4 (GFEDv4), ORNL DAAC, Oak  
Ridge, Tennessee, USA, <https://doi.org/10.3334/ORNLDAAAC/1293>, 2015.
